# Supplementary material for: Diagnostic Interval and Social Determinants of Health in Lung Cancer: A Mixed-Methods Study in Chile
Source: Research Square preprint supplement (doi:10.21203/rs.3.rs-7576484/v1), 2025-10-23
Supplement: Supplementary file 1 [file f599276f62295be24fefc96d.docx]

# Supplementary

## Sociodemographic and Health System Characteristics of the Sample in the quantitative phase (n=80)

| Variable | Category | Frequency (%) | 95% CI |
| --- | --- | --- | --- |
| Sex | Male | 32 (40%) | 29.26% – 50.74% |
| Female | 48 (60%) | 49.26% – 70.74% |
| Region of Residence | Metropolitan Region | 32 (40%) | 29.29% – 50.74% |
| Other Regions | 48 (60%) | 49.26% – 70.74% |
| Income Quintile | Quintile I | 16 (20%) | 11.23% – 28.77% |
| Quintile II | 14 (17.5%) | 9.17% – 25.83% |
| Quintile III | 11 (13.8%) | 6.2% – 21.3% |
| Quintile IV | 14 (17.5%) | 9.17% – 25.83% |
| Quintile V (Highest) | 16 (20%) | 11.23% – 28.77% |
| Educational Level | Primary or Secondary | 43 (53.8%) | 42.82% – 64.68% |
| Higher Education | 37 (46.3%) | 35.32% – 57.18% |
| Health Insurance System | Public System | 63 (78.3%) | 69.79% – 87.71% |
| Private System | 17 (21.3%) | 12.29% – 30.21% |

## Socio-demographic Characteristics of Participants in the qualitative phase

## Patients

| Identification code | Health system | Gender | Education | Region of residence |
| --- | --- | --- | --- | --- |
| P1F_PUBLIC | Public | Female | Incomplete | Metropolitan |
| P2F_PUBLIC | Public | Female | Incomplete | Metropolitan |
| P3F_PUBLIC | Public | Female | Complete | Metropolitan |
| P4M_PUBLIC | Public | Male | Complete | Other region (northern) |
| P5M_PUBLIC | Public | Male | Complete | Metropolitan |
| P6M_PUBLIC | Public | Male | Complete | Metropolitan |
| P7F_PUBLIC | Public | Female | Incomplete | Metropolitan |
| P8M_PUBLIC | Public | Male | Complete | Metropolitan |
| P9F_PUBLIC | Public | Female | Incomplete | Metropolitan |
| P10F_PUBLIC | Public | Female | Incomplete | Metropolitan |
| P11F_PRIVATE | Private | Female | Complete | Other region (southern) |
| P12M_PUBLIC | Public | Male | Complete | Other region (southern) |
| P13M_PUBLIC | Public | Male | Incomplete | Metropolitan |
| P14F_PUBLIC | Public | Female | Incomplete | Other region (northern) |
| P15M_PUBLIC | Public | Male | Complete | Other region (northern) |
| P16M_PRIVATE | Private | Male | Complete | Other region (southern) |
| P17M_PUBLIC | Public | Male | Incomplete | Other region (northern) |
| P18M_PUBLIC | Public | Male | Incomplete | Metropolitan |

## Health professionals

| Identification code | Health system work | Gender | Medical specialty | Region of work |
| --- | --- | --- | --- | --- |
| M1H_PUBLIC | Public | Male | Physician | Metropolitan and northern |
| M2H_PUBLIC | Public | Male | Physician | Metropolitan |
| M3H_PUBLIC/PRIVATE | Public/Private | Male | Physician | Other region (southern) |
| M4H_PUBLIC | Public | Male | Physician | Metropolitan |
| M5H_PRIVATE | Private | Male | Physician | Metropolitan |
| M6H_PUBLIC | Public | Female | Physician | Other region (northern) |
| EU1_PUBLIC | Public | Female | Nurse | Metropolitan |
| EU2_PUBLIC/PRIVATE | Public/Private | Female | Nurse | Metropolitan |

## Civil society leader

| Identification code | Work | Gender | Age |
| --- | --- | --- | --- |
| Soc. Leader | Patient foundation | Male | 52 |

## Caregivers or significant ones

| **Code** | **Sex** | **Occupation** | **Region of residence** |
| --- | --- | --- | --- |
| F_LC_67_doughter | Female | Housewife | Metropolitan region |
| M_LC_47_son | Male | Biochemical | Metropolitan region |
| F_LC_39_dougther | Female | Engineer | Metropolitan region |
| F_LC_>60_wife | Female | Retired | VI región |
| F_LC_29_doughter | Female | Lawyer | Metropolitan region |
| M_LC_37_son | Male | Physician | Metropolitan region |
| F_LC_47_nephew | Female | Medical representative | Metropolitan region |
| F_LC_47_dougther | Female | Housewife | XII region |
| F_LC_68_wife | Female | Nursing assistant | Metropolitan region |
| F_LC_54_doughter | Female | Psychologist | V region |

## Description of the Interval from First Consultation to Diagnostic Confirmation

| Diagnostic Interval | n | Mean | Standard Deviation | Median | Min – Max | Range | 95% CI |
| --- | --- | --- | --- | --- | --- | --- | --- |
| First consultation – diagnostic confirmation | 78 | 79.08 | 118.81 | 30.5 | 0 – 578 | 578 | 52.3 – 105.87 |
| No response | 2 | | | | | | |
